# Supplementary material for: Plasma Metabolite Response to Simple, Refined and Unrefined Carbohydrate-Enriched Diets in Older Adults—Randomized Controlled Crossover Trial
Source: MDPI journal article supplement (doi:10.3390/metabo12060547), 2022-06-15
Supplement: s1 [file s1]

**Plasma metabolite response to simple, refined and unrefined carbohydrate-enriched diets  
in older adults – randomized controlled crossover trial**

Neil K. Huang,<sup>1</sup> Nirupa R. Matthan,<sup>1</sup> Gregory Matuszek,<sup>2</sup> Alice H. Lichtenstein\*,<sup>1</sup>

<sup>1</sup>Cardiovascular Nutrition Laboratory, Jean Mayer USDA Human Nutrition Research Center on Aging at Tufts University, Boston, MA 02111 U.S.A.

<sup>2</sup>Informatics Core Unit, Jean Mayer USDA Human Nutrition Research Center on Aging at Tufts University, Boston, MA 02111 U.S.A.

\*Corresponding author: Alice H. Lichtenstein, D.Sc.,

\*Correspondence:

Jean Mayer USDA Human Nutrition Research Center on Aging

Tufts University

711 Washington Street

Boston, MA 02111

Phone: (617)556-3127

Short title: Plasma biomarkers for dietary carbohydrate type

Journal Subject Terms: Dietary Composition, Dietary Biomarkers, Metabolomics, and

Prevention/ Cardiovascular Disease

**Supplementary Table S1.** Composition of the 3 experimental diets.

| Variables                 | Simple carb diet | Refined carb diet | Unrefined carb diet |
|---------------------------|------------------|-------------------|---------------------|
|                           | % energy         |                   |                     |
| Carbohydrate              | 63.9             | 60.8              | 61.7                |
| Protein                   | 13.4             | 14.2              | 14.7                |
| Total fat                 | 22.7             | 24.7              | 23.6                |
| SFA                       | 6.8              | 7.9               | 6.6                 |
| MUFA                      | 8.7              | 9.4               | 9.2                 |
| PUFA                      | 6.9              | 6.9               | 7.4                 |
| Trans                     | 0.3              | 0.5               | 0.4                 |
| Cholesterol (mg/1000kcal) | 108              | 99                | 99                  |
| Fiber (g/1000 kcal)       | 8.6              | 9.6               | 19.5                |
| Soluble                   | 2.2              | 2.8               | 4.4                 |
| Insoluble                 | 6.4              | 6.8               | 15.1                |
| Total sugar (g/1000kcal)  | 86.0             | 62.7              | 57.9                |
| Starch (g/1000kcal)       | 44.6             | 47.1              | 50.9                |

The table was adapted from the parent study.<sup>12</sup> The data of carbohydrate, protein, and fat are presented as percentage of total calories, and other compositions are presented as indicated. MUFA, monounsaturated fatty acids; PUFA, polyunsaturated fatty acids; SFA, saturated fatty acids; carb, carbohydrate.

**Supplementary Table S2.** Cardiometabolic risk factors of the study participants at the end of each dietary phase.

| Variables                          | Simple Carb                | Refined Carb               | Unrefined Carb             |
|------------------------------------|----------------------------|----------------------------|----------------------------|
| Weight, kg                         | 85 ± 12                    | 85 ± 12                    | 86 ± 13                    |
| Body Mass Index, kg/m <sup>2</sup> | 29.6 ± 2.9                 | 29.7 ± 2.9                 | 30.0 ± 3.0                 |
| Fasting glucose, mmol/L            | 5.3 (5.0-5.6)              | 5.2 (5.0-5.5)              | 5.1 (4.8-5.4)              |
| Total cholesterol, mmol/L          | 5.2 (3.8-7.2) <sup>b</sup> | 5.5 (4.0-7.6) <sup>a</sup> | 5.2 (3.8-7.1) <sup>b</sup> |
| Non-HDL-C, mmol/L                  | 4.0 (2.8-5.7) <sup>b</sup> | 4.3 (3.0-6.1) <sup>a</sup> | 4.0 (2.8-5.6) <sup>b</sup> |
| LDL-C, mmol/L                      | 3.2 (2.2-4.5) <sup>b</sup> | 3.4 (2.4-4.8) <sup>a</sup> | 3.1 (2.2-4.4) <sup>b</sup> |
| VLDL-C, mmol/L                     | 0.8 (0.5-1.3)              | 0.8 (0.5-1.4)              | 0.8 (0.5-1.3)              |
| HDL-C, mmol/L                      | 1.2 (1.0-1.5)              | 1.2 (1.0-1.5)              | 1.2 (1.0-1.5)              |
| Triacylglycerol, mmol/L            | 1.7 (1.0-2.9)              | 1.9 (1.1-3.1)              | 1.7 (1.0-2.9)              |

Values were presented as mean±SD for weight and body mass index, and other continuous variables were presented as mean (95% confidence interval) (*N*=10). The table was adapted from the parent study [12]. Dietary effect in the parent study was assessed using repeated measure one-way ANOVA, followed by Tukey-Kramer post hoc analysis, *p*<0.01, a>b. HDL-C, high-density lipoprotein-cholesterol; LDL-C, low-density lipoprotein-cholesterol; TC/HDL-C, the ratio of total cholesterol: high-density lipoprotein-cholesterol; VLDL-C, very low-density lipoprotein-cholesterol.

**Supplementary Table S3.** The electrospray ionization mode, m/z value and retention time for the metabolites with Variable importance projection scores > 1.7.

| Metabolites                | Category         | VIP score | ESI mode | m/z;<br>Quant<br>m/z* | RT; RT<br>index* |
|----------------------------|------------------|-----------|----------|-----------------------|------------------|
| Phenylethylamine           | Amino acid       | 3.03      | -        | 174*                  | 513300*          |
| Cysteine                   | Amino acid       | 3.00      | -        | 220*                  | 500185*          |
| Betaine                    | Xenobiotics      | 2.84      | ESI (+)  | 118.0861              | 6.92             |
| Pipecolic acid             | Amino acid       | 2.83      | ESI (+)  | 130.084               | 7.46             |
| TMAO                       | Amino acids      | 2.57      | ESI (+)  | 76.0756               | 5.29             |
| 3-Methylhistidine          | Amino acids      | 2.49      | ESI (-)  | 168.0773              | 9.16             |
| PC 38:3                    | Phospholipids    | 2.47      | ESI (+)  | 812.6147              | 5.77             |
| TG 42:0                    | Lipids           | 2.45      | ESI (+)  | 740.6776              | 9.43             |
| TG 51:1(TG 16:0_17:0_18:1) | Lipids           | 2.45      | ESI (+)  | 864.8098              | 11.0             |
| Conduritol-beta-epoxide    | Xenobiotics      | 2.37      | -        | 318*                  | 675635*          |
| N-acetylglycine            | Amino acids      | 2.37      | ESI (-)  | 116.0359              | 7.19             |
| TG 45:1(TG 12:0_16:0_17:1) | Lipids           | 2.29      | ESI (+)  | 780.7114              | 9.70             |
| PI 36:4                    | Phospholipids    | 2.25      | ESI (-)  | 857.5192              | 4.34             |
| TG 46:2                    | Lipids           | 2.24      | ESI (+)  | 792.7114              | 9.52             |
| TG 44:0                    | Lipids           | 2.23      | ESI (+)  | 768.7067              | 9.92             |
| Pipecolinic acid           | Amino acids      | 2.23      | -        | 156*                  | 404121*          |
| Coniferyl aldehyde         | Xenobiotics      | 2.17      | ESI (-)  | 177.0556              | 1.32             |
| TG 54:5(TG 18:1_18:2_18:2) | Lipids           | 2.15      | ESI (+)  | 898.7851              | 10.1             |
| 3-hydroxybutyric acid      | Ketone           | 2.12      | ESI (-)  | 103.0412              | 1.87             |
| LPC 20:3                   | Phospholipids    | 2.11      | ESI (+)  | 546.3558              | 1.37             |
| 3,5-Dihydroxyphenylglycine | Amino acids      | 2.10      | ESI (+)  | 184.0694              | 7.99             |
| TG 47:1 TG 14:0_15:0_18:1  | Lipids           | 2.06      | ESI (+)  | 808.7356              | 10.2             |
| TG 49:0                    | Lipids           | 2.05      | ESI (+)  | 838.7961              | 11.0             |
| Lyxitol                    | Carboxylic acids | 2.05      | -        | 217*                  | 573587           |
| 10-Hydroxydecanoic acid    | Lipids           | 2.05      | ESI (-)  | 187.1341              | 1.27             |
| Lactic acid                | Carboxylic acids | 2.00      | -        | 191*                  | 217657*          |
| 2-Methylglutaric acid      | Amino acids      | 1.99      | ESI (-)  | 145.0509              | 2.18             |
| 3-Hydroxybutyrylcarnitine  | Lipids           | 1.98      | ESI (+)  | 248.1492              | 7.26             |
| Tetradecylsulfate          | Xenobiotics      | 1.97      | ESI (-)  | 293.1784              | 1.10             |
| TG 49:1 TG 15:0_16:0_18:1  | Lipids           | 1.97      | ESI (+)  | 836.788               | 10.6             |
| TG 46:0                    | Lipids           | 1.96      | ESI (+)  | 796.7418              | 10.4             |
| TG 53:1 TG 17:0_18:0_18:1  | Lipids           | 1.95      | ESI (+)  | 892.843               | 11.4             |
| Quinolone                  | Xenobiotics      | 1.95      | ESI (+)  | 146.0634              | 1.31             |
| TG 54:3 TG 18:0_18:1_18:2  | Lipids           | 1.94      | ESI (+)  | 902.8325              | 10.9             |
| TG 47:2 TG 14:0_15:0_18:2  | Lipids           | 1.92      | ESI (+)  | 806.7283              | 9.75             |
| TG 54:8 TG 18:2_18:3_18:3  | Lipids           | 1.91      | ESI (+)  | 892.7405              | 8.97             |
| PC 38:2                    | Phospholipids    | 1.90      | ESI (+)  | 814.6323              | 6.18             |
| TG 47:0 TG 15:0_16:0_16:0  | Lipids           | 1.89      | ESI (+)  | 810.754               | 10.6             |
| Trigonelline               | Vitamins         | 1.89      | ESI (+)  | 138.0544              | 5.72             |
| Indole-3-propionic acid    | Xenobiotics      | 1.88      | -        | 202*                  | 732249*          |

|                             |               |      |         |                  |                     |
|-----------------------------|---------------|------|---------|------------------|---------------------|
| TG 46:3 Isomer A            | Lipids        | 1.88 | ESI (+) | 790.693          | 9.04                |
| PC 33:1                     | Phospholipids | 1.87 | ESI (+) | 746.5717         | 5.14                |
| Deoxypentitol               | Carbohydrate  | 1.86 | -       | 231 <sup>*</sup> | 528774 <sup>*</sup> |
| TG 51:0 TG 16:0_17:0_18:0   | Lipids        | 1.85 | ESI (+) | 866.8299         | 11.36               |
| TG 48:1                     | Lipids        | 1.85 | ESI (+) | 822.763          | 10.4                |
| Riluzole                    | Xenobiotics   | 1.81 | ESI (-) | 232.9955         | 1.04                |
| Proline                     | Amino acids   | 1.81 | -       | 114.0566         | 7.52                |
| Nateglinide                 | Xenobiotics   | 1.81 | ESI (-) | 316.188          | 1.18                |
| PC 30:0                     | Phospholipids | 1.81 | ESI (+) | 706.5359         | 4.77                |
| PC 36:1                     | Phospholipids | 1.81 | ESI (+) | 788.615          | 6.09                |
| Indoxyl sulfate             | Amino acids   | 1.80 | ESI (-) | 212.0029         | 1.38                |
| TG 42:1                     | Lipids        | 1.79 | ESI (+) | 738.6621         | 8.93                |
| Hexadecanedioic acid        | Xenobiotics   | 1.78 | ESI (-) | 285.2066         | 1.24                |
| TG 52:5                     | Lipids        | 1.78 | ESI (+) | 870.7491         | 9.79                |
| Glutamine                   | Amino acids   | 1.77 | ESI (+) | 147.0772         | 8.29                |
| Mannitol                    | Carbohydrate  | 1.76 | ESI (-) | 181.0709         | 7.54                |
| 1,2-Diamino-2-methylpropane | Xenobiotics   | 1.76 | ESI (+) | 72.0806          | 7.38                |
| 3-Hydroxybutyric acid       | Ketone        | 1.75 | ESI (-) | 103.0412         | 1.87                |
| Homovanillic acid           | Hormone       | 1.75 | ESI (-) | 181.0504         | 1.41                |
| PI 40:6                     | Phospholipids | 1.74 | ESI (-) | 909.5487         | 4.75                |

Asterisk indicates the data were from gas chromatography time-of-flight mass spectrometry. ESI, electrospray ionization; PC, phosphatidylcholine; PI, phosphatidylinositol; RT, retention time; TG, triacylglycerol.

**Supplementary Table S4.** Pearson Correlation Coefficient between top 5 plasma metabolites and cardiometabolic risk factors – simple, refined and unrefined carbohydrate diets.

| Plasma metabolite   | TC     | TG     | VLDL   | LDL    | HDL    |
|---------------------|--------|--------|--------|--------|--------|
| Simple carb diet    |        |        |        |        |        |
| Phenylethylamine    | -0.201 | -0.251 | -0.251 | -0.174 | -0.040 |
| Cysteine            | 0.342  | 0.590  | 0.593  | 0.248  | 0.042  |
| Betaine             | -0.282 | -0.384 | -0.369 | -0.289 | 0.072  |
| Pipecolic acid      | 0.599  | 0.247  | 0.262  | 0.509  | 0.600  |
| 3-Methylhistidine   | 0.291  | 0.255  | 0.262  | 0.314  | -0.001 |
| Refined carb diet   |        |        |        |        |        |
| Phenylethylamine    | -0.295 | -0.282 | -0.267 | -0.223 | -0.106 |
| Cysteine            | -0.311 | -0.325 | -0.314 | -0.298 | 0.008  |
| Betaine             | 0.007  | 0.399  | 0.388  | -0.107 | -0.231 |
| Pipecolic acid      | -0.371 | -0.084 | -0.077 | -0.388 | -0.167 |
| 3-Methylhistidine   | -0.127 | -0.145 | -0.160 | -0.101 | -0.024 |
| Unrefined carb diet |        |        |        |        |        |
| Phenylethylamine    | -0.143 | 0.006  | -0.008 | -0.053 | -0.330 |
| Cysteine            | -0.291 | 0.086  | 0.067  | -0.273 | -0.307 |
| Betaine             | -0.086 | 0.009  | 0.012  | -0.083 | -0.055 |
| Pipecolic acid      | 0.095  | -0.182 | -0.178 | 0.083  | 0.246  |
| 3-Methylhistidine   | 0.021  | 0.212  | 0.206  | -0.032 | -0.021 |

Values were presented as correlation coefficient ( $r$ ). No significant correlation was found. HDL, high-density lipoprotein; LDL, low-density lipoprotein; TC, total cholesterol; TG, triglyceride; carb, carbohydrate.

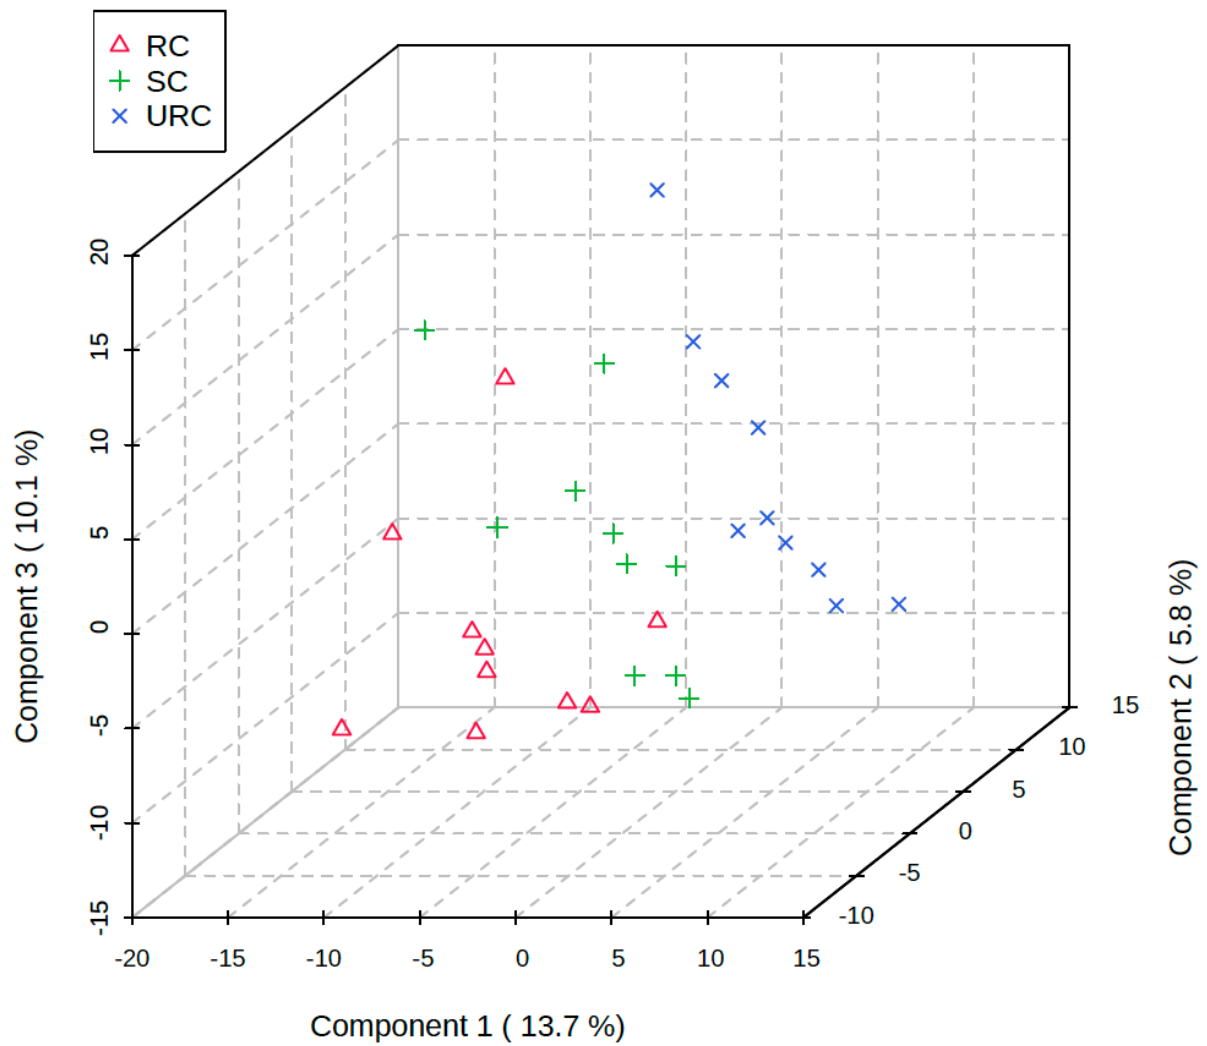

**Supplementary Figure S1.** Partial least squares discriminant analysis (PLS-DA) of the plasma metabolites in participants after they received the simple carbohydrate, refined carbohydrate and unrefined carbohydrate diets.

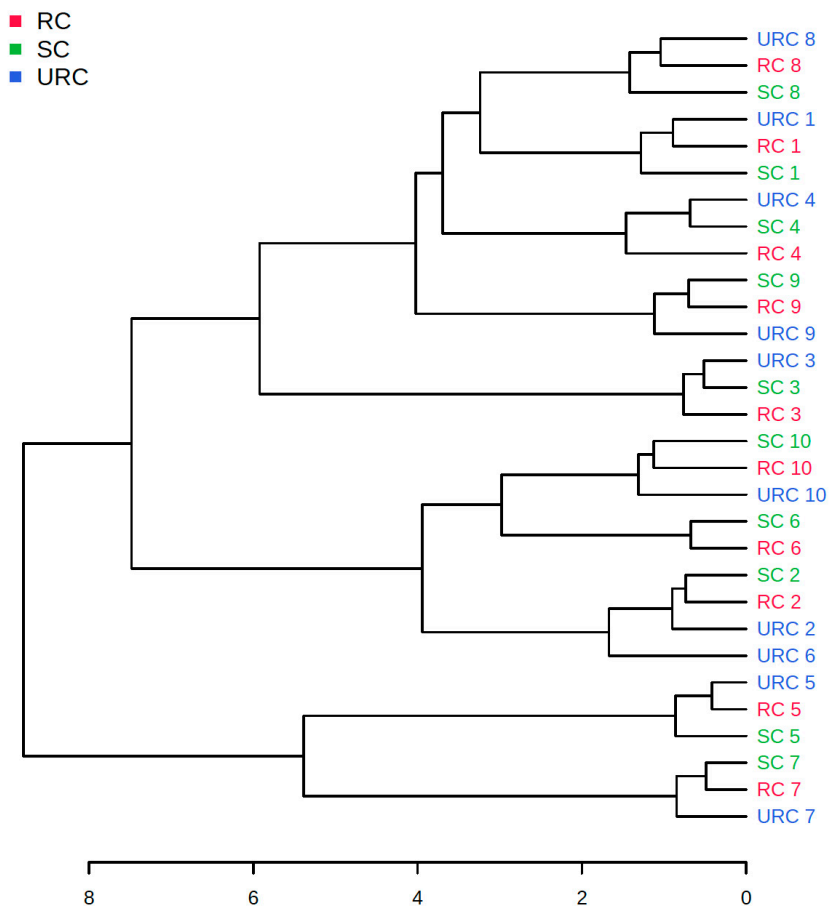

**Supplementary Figure S2.** Hierarchical clustering of the plasma metabolites in participants after they received the simple carbohydrate, refined carbohydrate, and unrefined carbohydrate diets.
